# Supplementary material for: One-pot homopolymerization of thiophene-fused isoindigo for ambient-stable ambipolar organic field-effect transistors
Source: Royal Society of Chemistry journal article supplement (doi:10.1039/c7ra01139c), 2017-01-01

# One-pot homopolymerization of thiophene-fused isoindigo for ambient-stable ambipolar organic field-effect transistors

Huanrui Zhang,<sup>a,#</sup> Zhiyuan Zhao,<sup>b,c,#</sup> Na Zhao,<sup>a</sup> Yu Xie,<sup>a</sup> Mian Cai,<sup>a,d</sup> Xiao Wang,<sup>a</sup> Yunqi Liu,<sup>b</sup>  
Zhenggang Lan,<sup>a</sup> Xiaobo Wan<sup>\*,a,d</sup>

<sup>a</sup> CAS Key Laboratory of Bio-based Materials, Qingdao Institute of Bioenergy & Bioprocess Technology, Chinese Academy of Sciences, 189 Songling Road, Qingdao 266101, People's Republic of China.

<sup>b</sup> Institute of Chemistry, Chinese Academy of Sciences, Beijing 100080, People's Republic of China.

<sup>c</sup> Northeast Normal University, Changchun 130024, People's Republic of China.

<sup>d</sup> University of Chinese Academy of Sciences, Beijing 100049, People's Republic of China.

# These two authors contributed equally to this work.

## Contents

- 1) TGA thermograms of all the polymers (Figure S1)
- 2) Cyclic voltammograms of reference and random copolymers (Figure S2)
- 3) Output (a) and (b) transfer characteristics of P(TII-co-II) (Figure S3)
- 4) Output (c) and (d) transfer characteristics of PTII-1 (Figure S4)
- 5) The GIXRD corresponding in-plane and out-of-plane line cuts of all the polymers (Figure S5)
- 6) <sup>1</sup>H NMR Spectra of polymers (Figure S6-8)
- 7) GPC chromatograms of polymers (Figure S9)

**Figure S1** TGA thermograms of all the polymers at 10 °C/min under N<sub>2</sub> atmosphere.

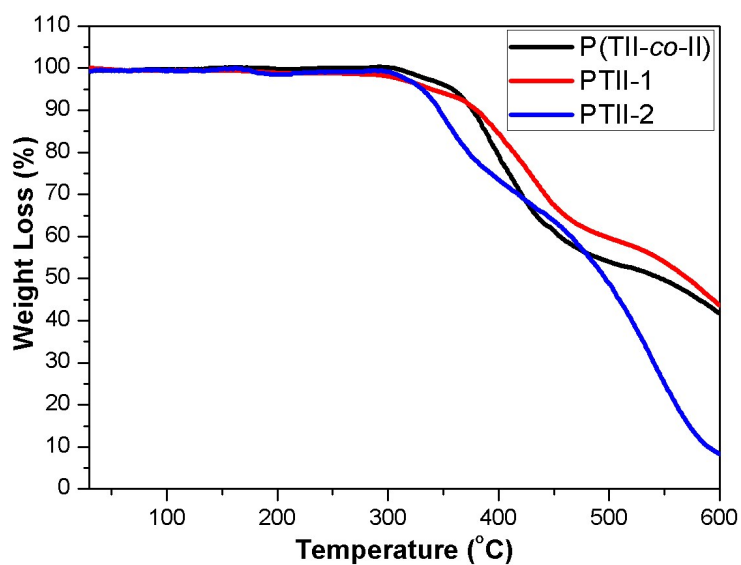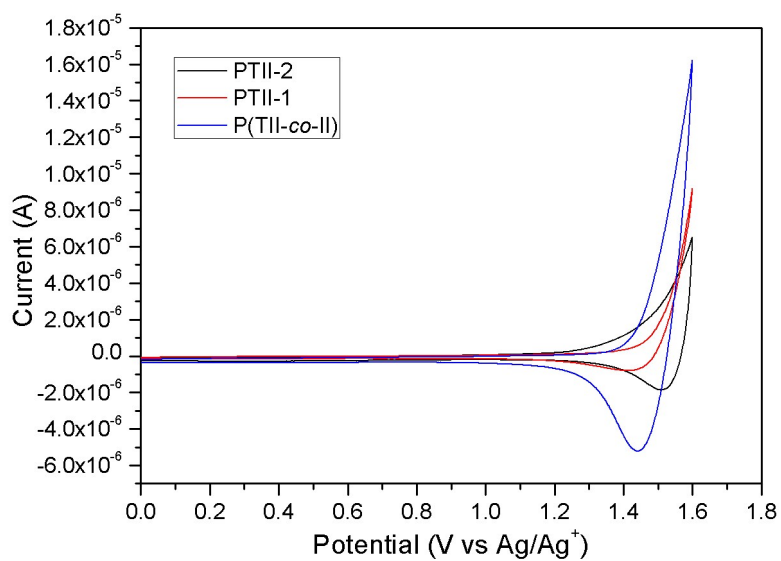

**Figure S2** Cyclic voltammogram of P(TII-co-II), PTII-1 and PTII-2 in thin film drop-casting on a glassy carbon electrode and tested in n-Bu<sub>4</sub>NPF<sub>6</sub>/CH<sub>3</sub>CN solution (scan rate: 0.1 V s<sup>-1</sup>).

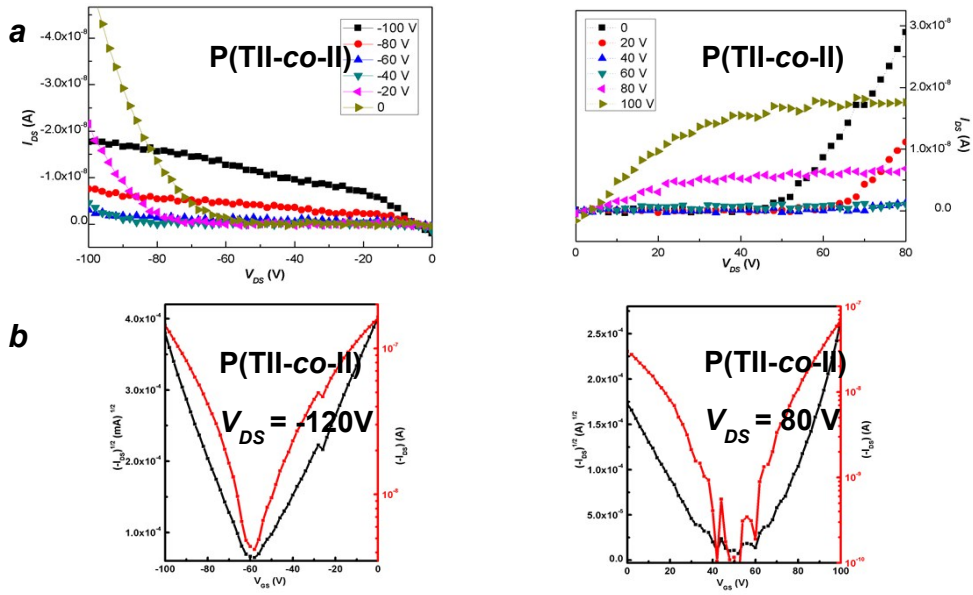

**Figure S3** Output (a) and (b) transfer characteristics of P(TII-co-II) annealed at 200 °C and tested under ambient conditions.

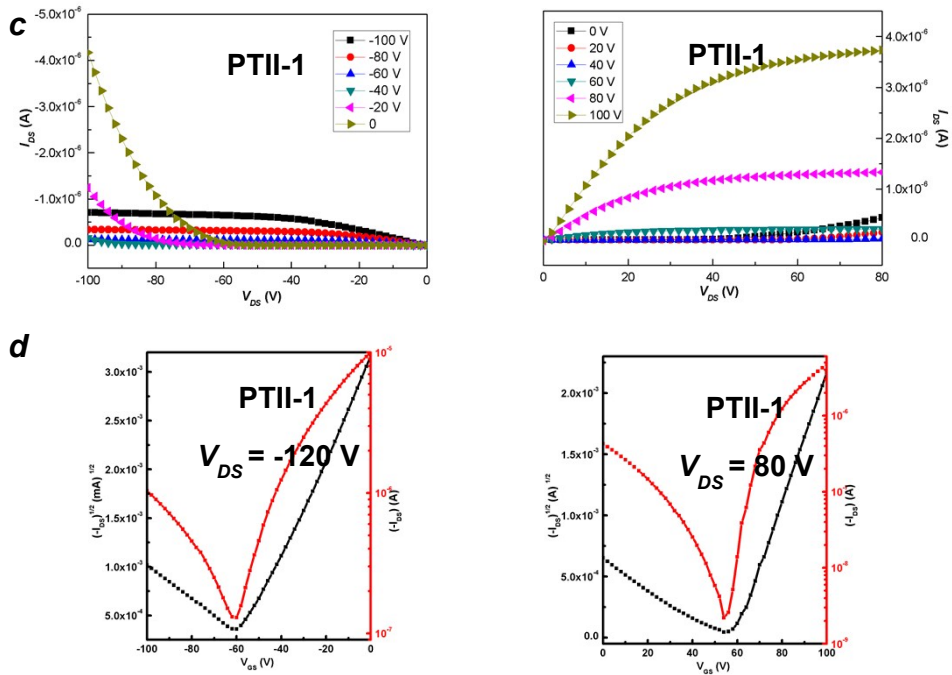

**Figure S4** Output (c) and (d) transfer characteristics of PTII-1 annealed at 200 °C and tested under ambient conditions.

**Figure S5** The GIXRD corresponding in-plane and out-of-plane line cuts of all the polymers.

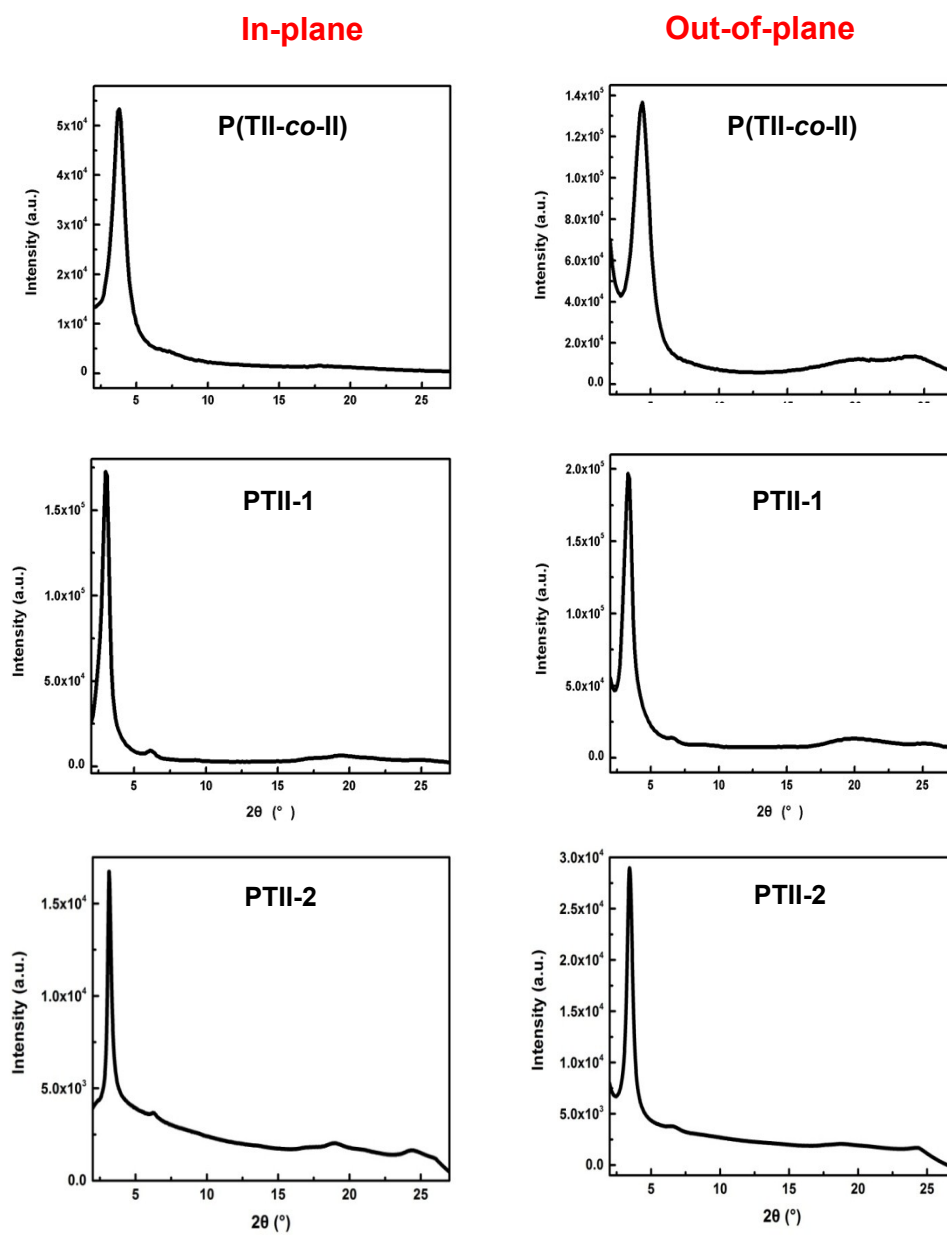

**Figure S6**  $^1\text{H}$  NMR spectra of P(TH-co-II)

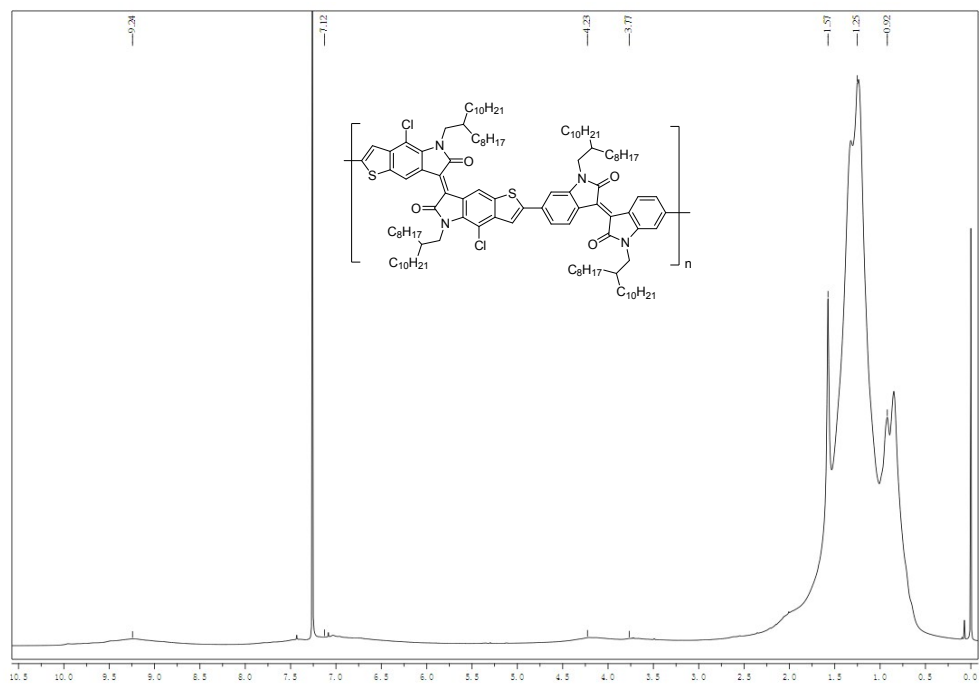

**Figure S7**  $^1\text{H}$  NMR spectra of PTII-1

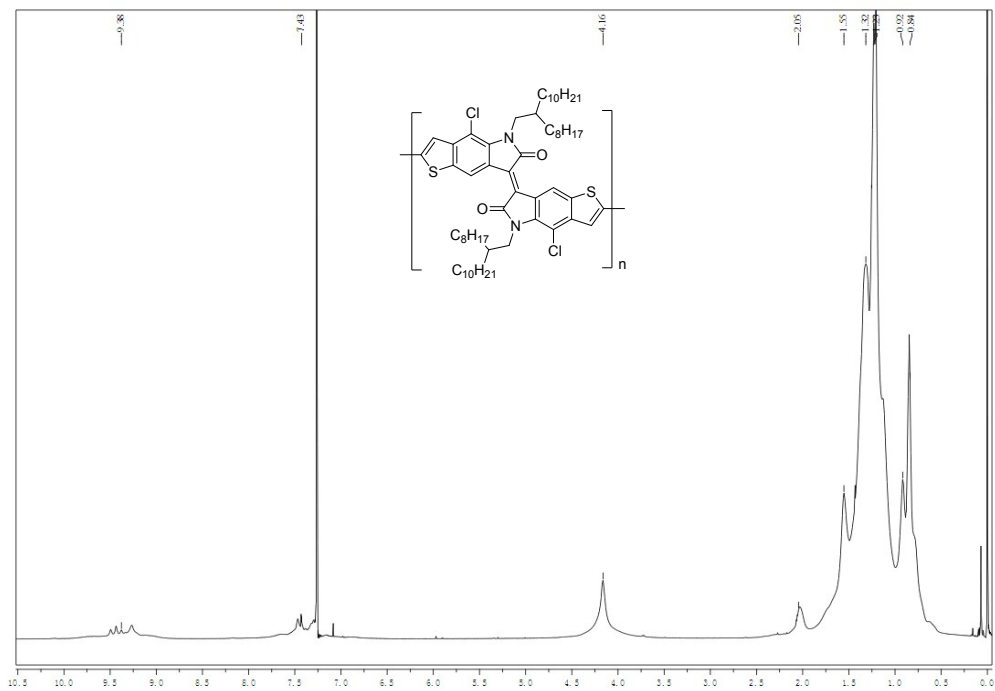

Figure S8  $^1\text{H}$  NMR spectra of PTII-2

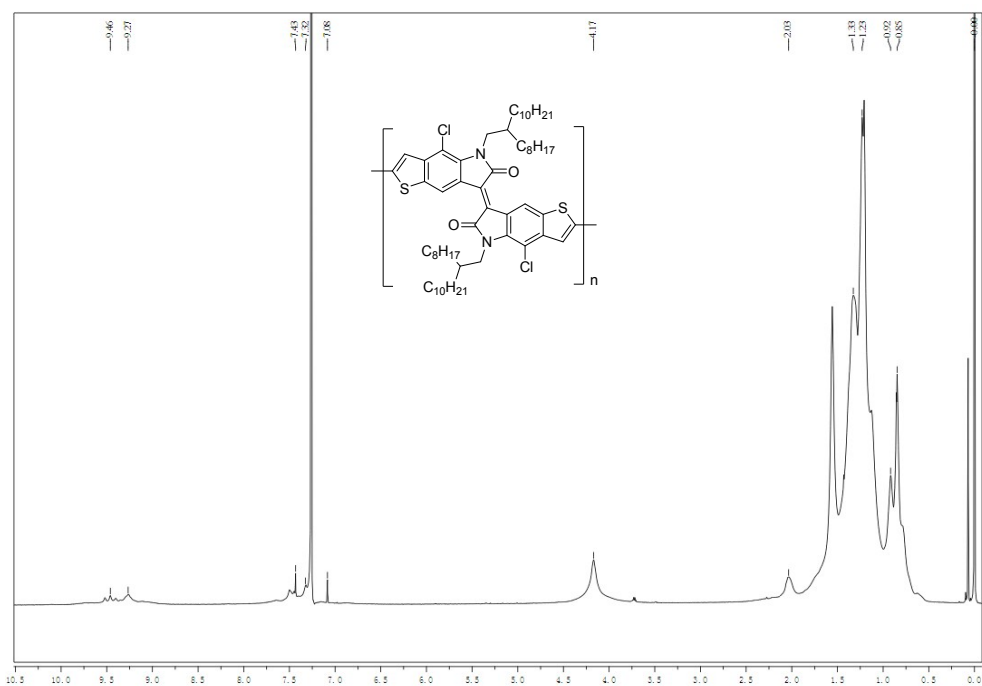

Figure S9 GPC chromatograms of polymers.

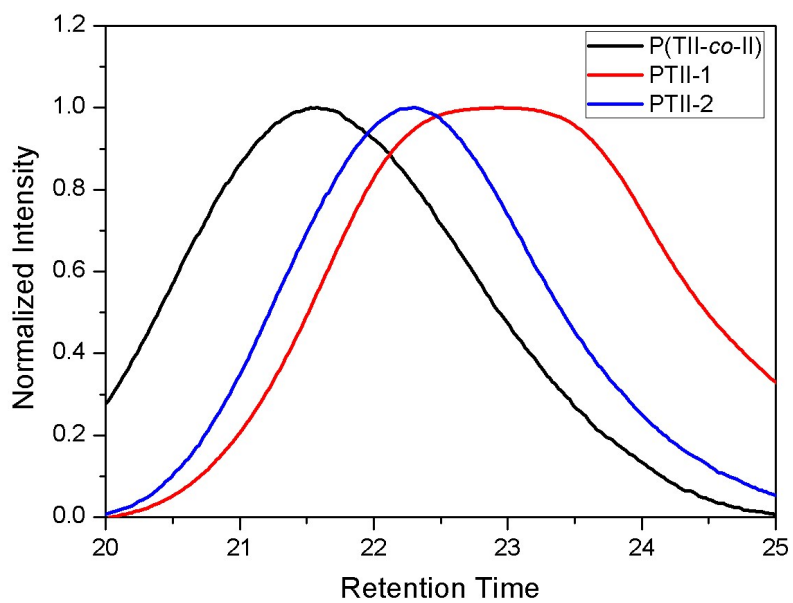

Supplement: c7ra01139c1.pdf [file c7ra01139c1.pdf]
